# Supplementary material
Source: Springer Nature journal article supplement (https://www.springermedizin.de/resource/supplementary/12958_2010_713_MOESM5_ESM.pdf/9568656)

**A**

|      |   |   |   |   |   |   |
|------|---|---|---|---|---|---|
| UTP  | - | + | - | + | - | + |
| Stau | - | - | + | + | - | - |
| Wort | - | - | - | - | + | + |

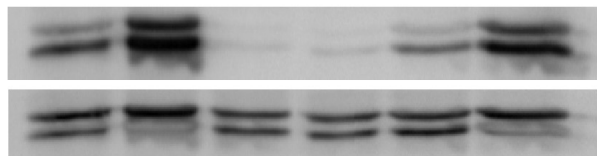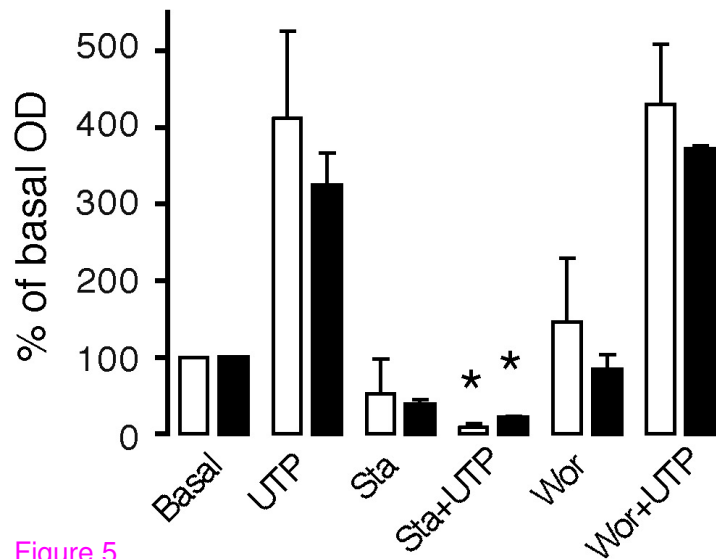**B**

|          |   |   |   |   |
|----------|---|---|---|---|
| UTP      | - | + | - | + |
| PMA 18 h | - | - | + | + |

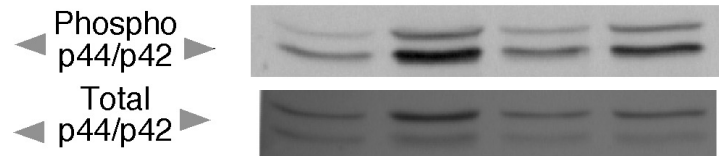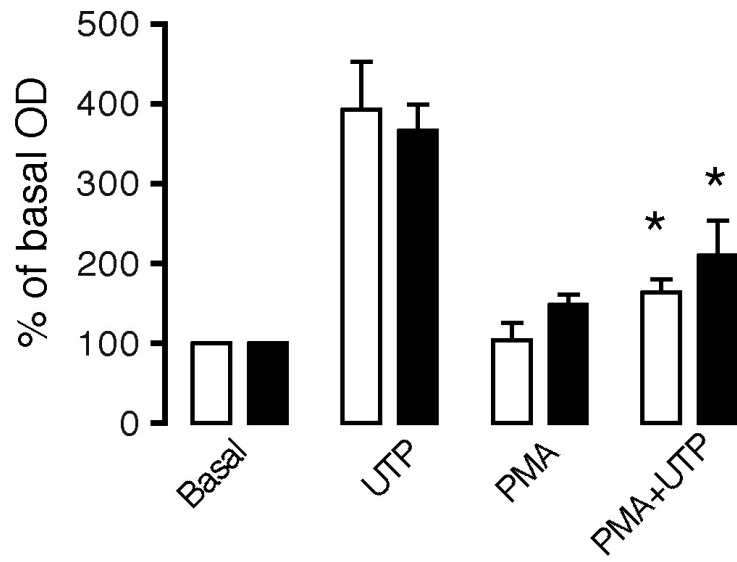

Figure 5

Supplement: MOESM5 [file 9568656]
